# Supplementary material for: Reprioritization of biofilm metabolism is associated with nutrient adaptation and long-term survival of Haemophilus influenzae
Source: PubMed Central journal article supplement (PMC6831627; doi:10.1038/s41522-019-0105-6), 2019-11-05
Supplement: 41522_2019_105_MOESM1_ESM.pdf [file 41522_2019_105_MOESM1_ESM.pdf]

## Proteomic analyses of RM33 and Parental Biofilms

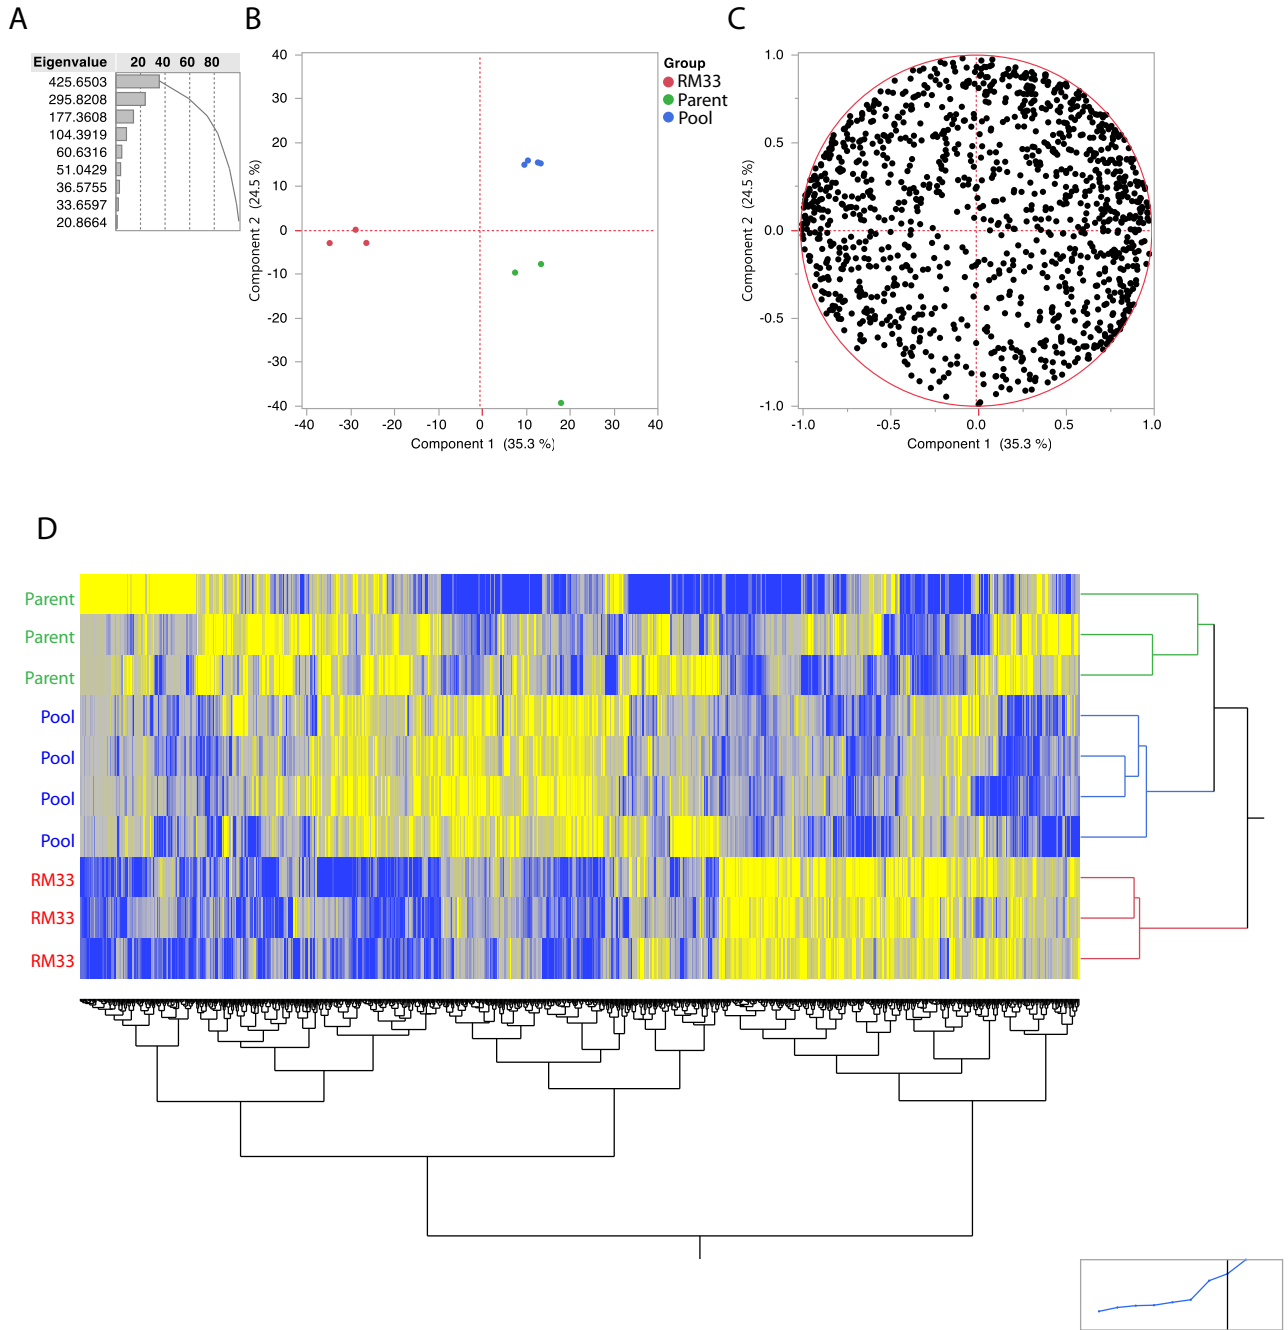

Supplemental Figure 1. **Proteomic analyses of RM33 and parental biofilms.** (A, B, C) Principal component analyses of the proteomes from the RM33 (red) and parental 86-028NP (green) samples taken from three independent biological replicates. The pool (blue) is a quality control where equivalent volumes of each sample (5  $\mu$ l) were combined and analyzed in three parallel trials for quality control purposes and demonstrate high technical fidelity. (D) Dendrogram of the proteins that are increased (yellow) or decreased (blue) in the RM33 biofilms as compared with the parental strain, 86-028NP. The “pool” analyses also demonstrate strong similarity as an indicator of technical reproducibility.

# Metabolomic analyses of RM33 and Parental Biofilms

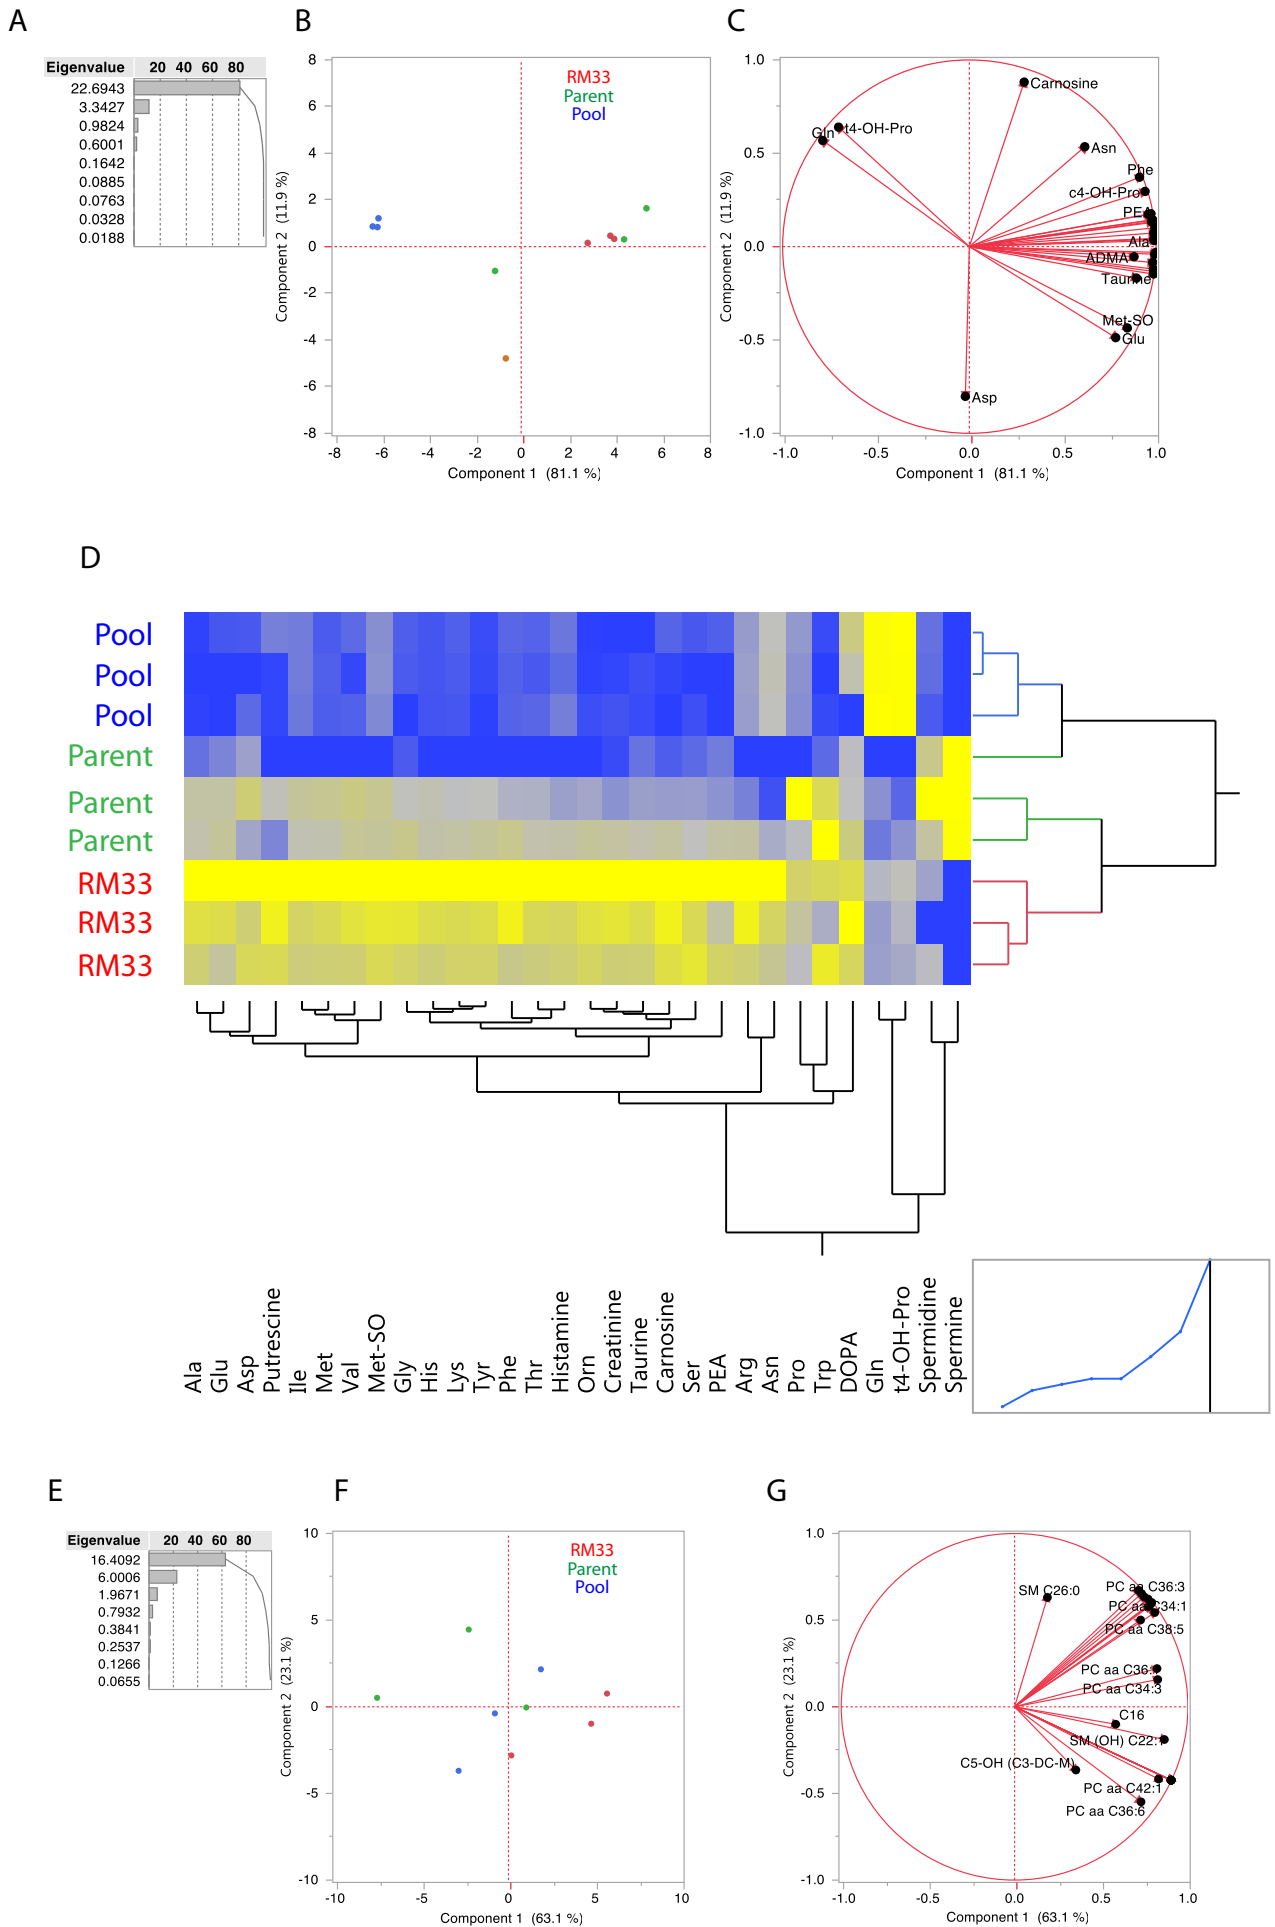

Supplemental Figure 2. **Metabolomic analyses of RM33 and parental biofilms.** (A, B, C) Principal component analyses of the metabolomes (UPLC) from the RM33 (red) and parental 86-028NP (green) samples taken from three independent biological replicates. The pool (blue) is a quality control where equivalent volumes of each sample (5  $\mu$ l) were combined and analyzed in three parallel trials for quality control purposes and demonstrate high technical fidelity. (D) Dendrogram of the proteins that are increased (yellow) or decreased (blue) in the RM33 biofilms as compared with the parental strain, 86-028NP. The “pool” samples also demonstrate strong similarity as an indicator of technical reproducibility. (E, F, G) Principal component analyses of the metabolomes (FIA) from the RM33 (red) and parental 86-028NP.

# Amino Acids Spent Culture/Fresh Media

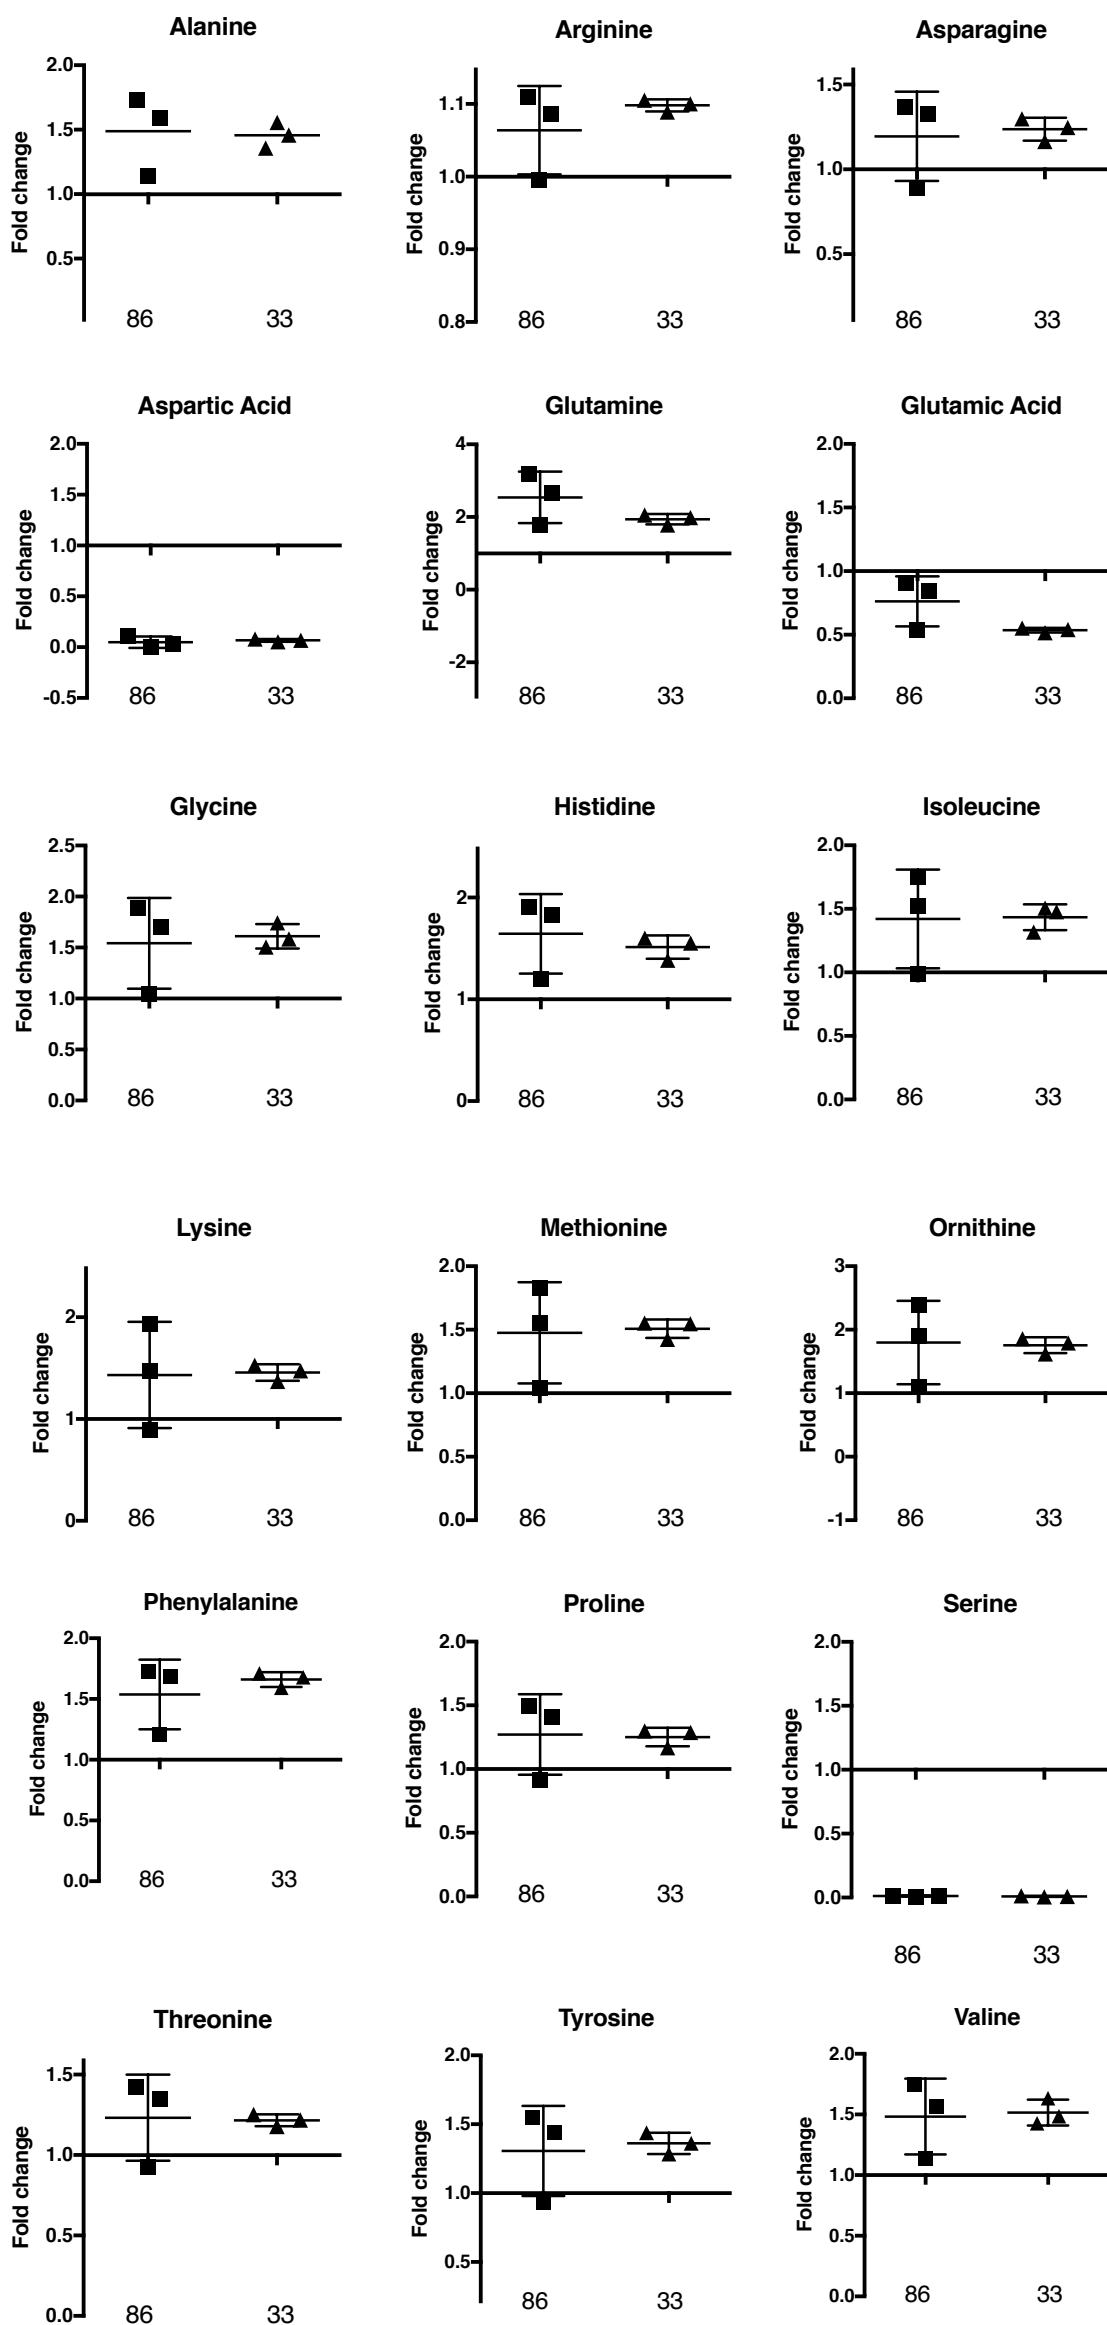

Supplemental Figure 3. **Amino acids present in the spent culture supernatant.** The extracellular concentration for each of the amino acids is reported as the ratio of fresh media over spent media. Statistical significance was determined using a two-tailed unpaired student's T-test.

# Biogenic Amines Spent Culture/Fresh Media

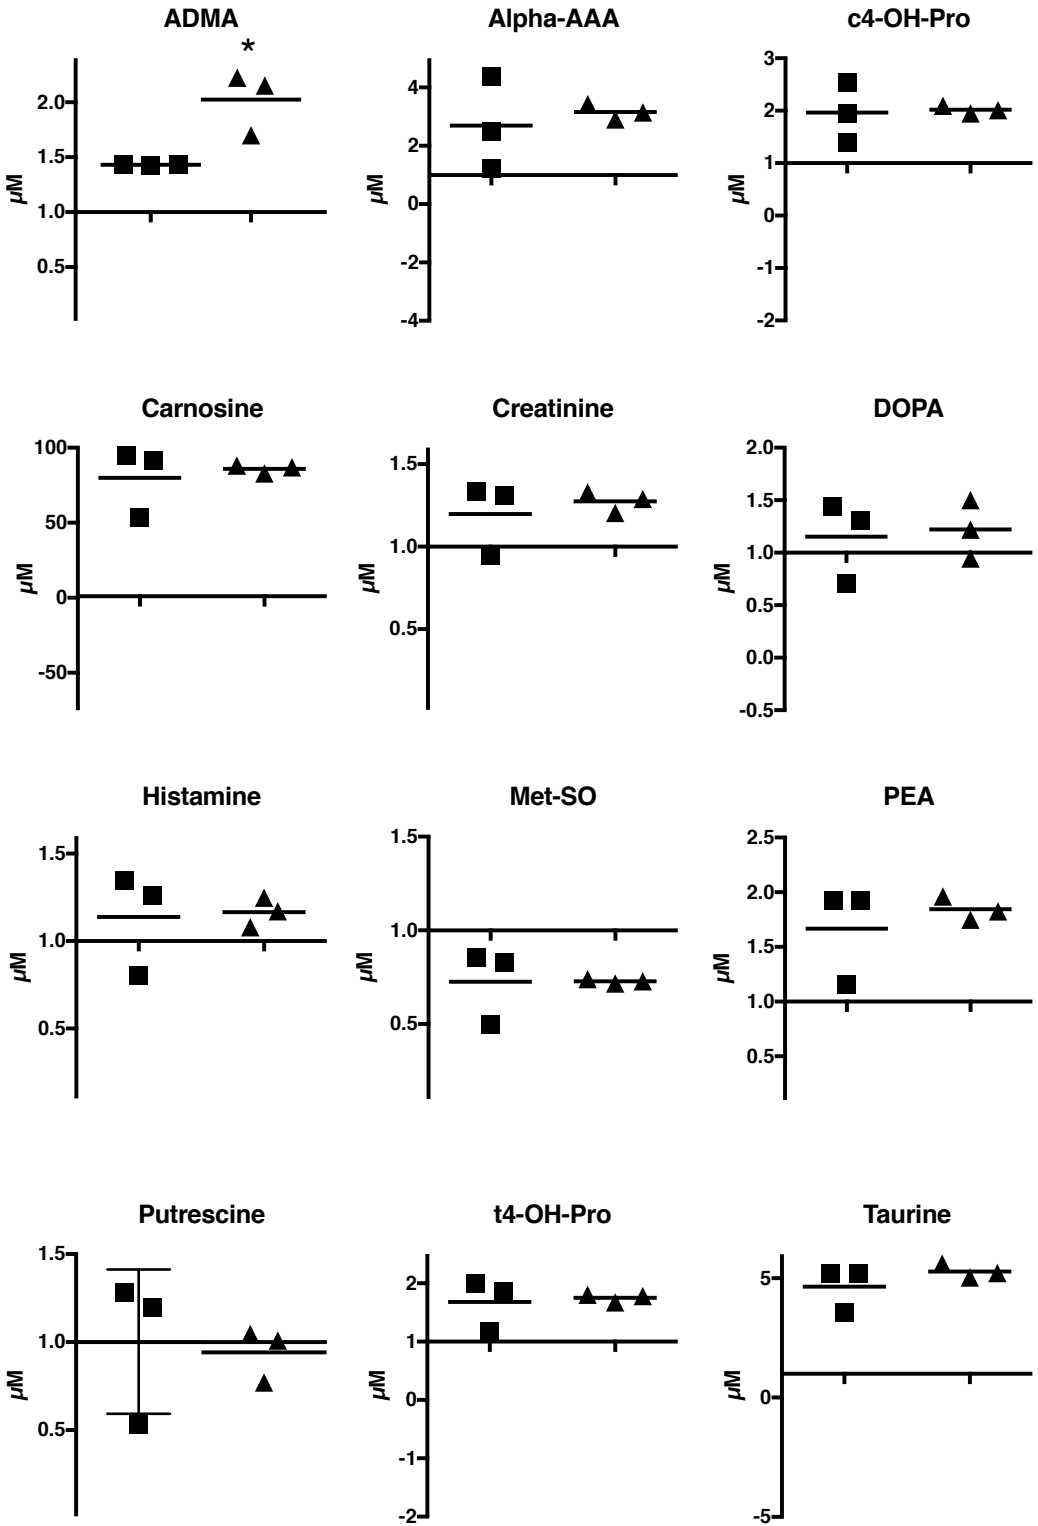

Supplemental Figure 4. **Biogenic amines present in the spent culture supernatant.** The extracellular concentration for each of the biogenic amines is reported as the ratio of fresh media over spent media. Statistical significance was determined using a two-tailed unpaired student's T-test.

# Acylcarnitines and PC Spent Culture/Fresh Media

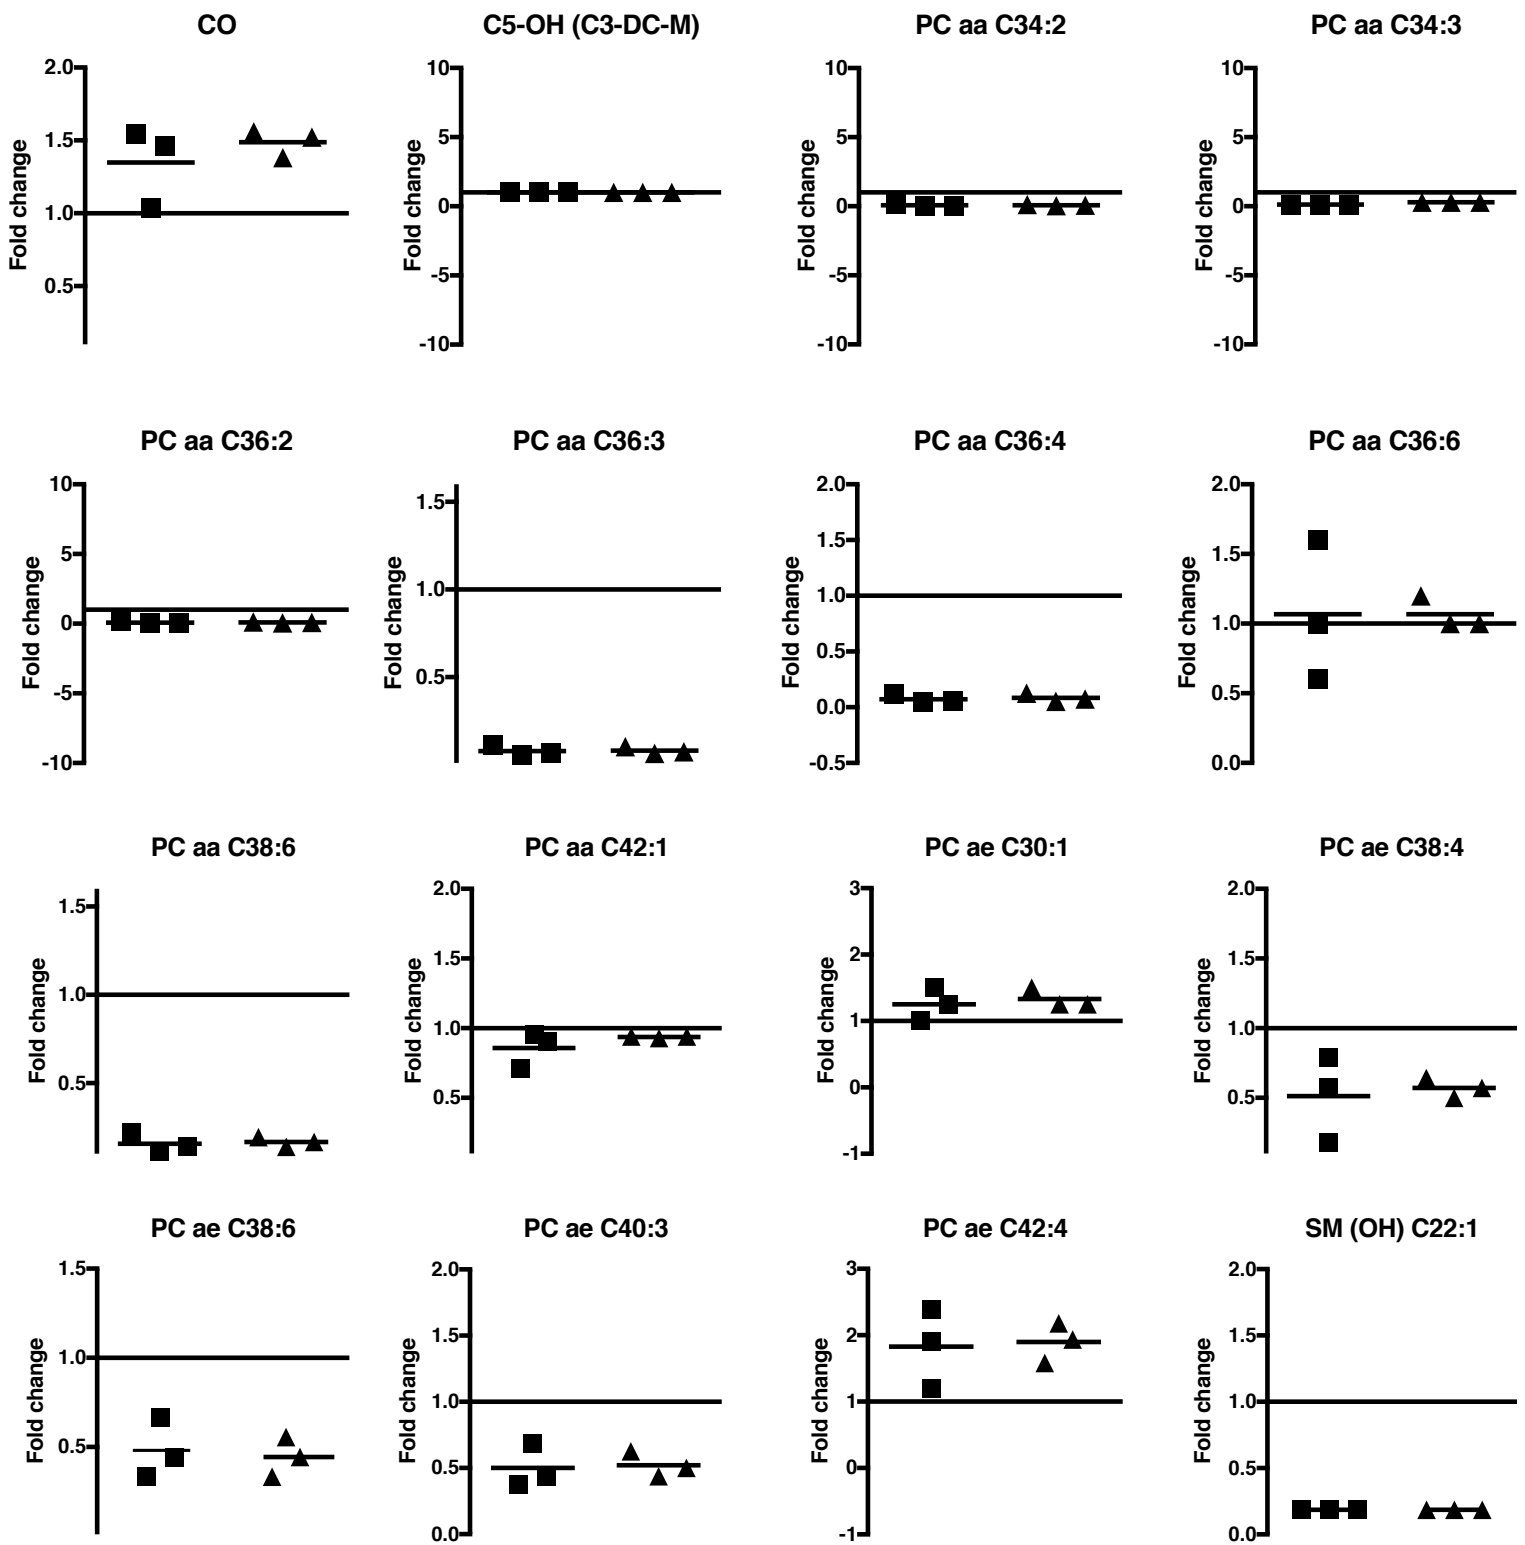

Supplemental Figure 5. **Acylcarnitines and glycerophospholipids in the spent culture supernatant.** The extracellular concentration for each of the acylcarnitines and glycerophospholipid is reported as the ratio of fresh media over spent media. Statistical significance was determined using a two-tailed unpaired student's T-test.

A

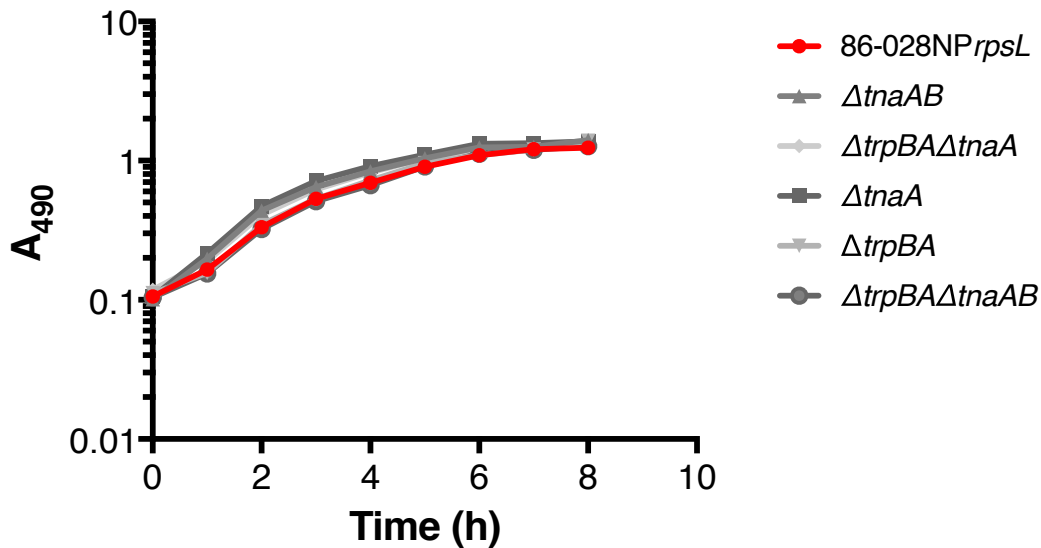

B

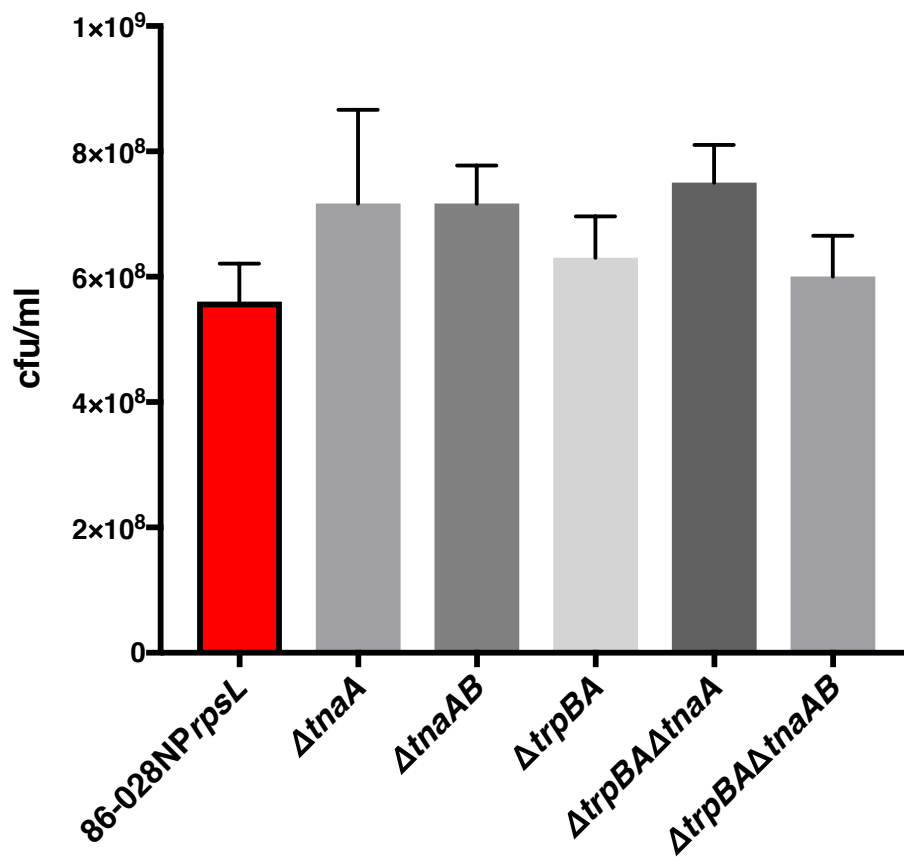

Supplemental Figure 6. **Growth of strains defective in tryptophan biosynthesis.**

(A) The growth rate of each individual mutant strain was determined by growth at 37C in sBHI with measurements of the absorbance at 490 nm every hour. Representative data from 3 independent experiments. (B) Samples were taken at the three hour time point to determine the viability of each strain. (n=3 independent experiments). Statistical significance was determined using a two-tailed unpaired T-test, no significant difference was observed.

**Supplemental Table 1****Primers used in this study**

| Primer | Sequence                             | Function                                                    |
|--------|--------------------------------------|-------------------------------------------------------------|
| AH0838 | CCGGCCGCCATGGCGATTGCTTACTTAGCAGGAAT  | In-Fusion primers to delete <i>tnaAB</i>                    |
| AH0839 | ACGGATCCCCGGAATCATAGCAAATCCCCAAAAA   |                                                             |
| AH0840 | CAGCTCCAGCCTACATTACCTTTCTTTAAGTTCTAA |                                                             |
| AH0841 | CGCGAATTCAGTAGTTTCGTCCAACCTCCGCATGGT |                                                             |
| AH0842 | CCGGCCGCCATGGCGCTTTGATACGTTGACTAAT   | In-Fusion primers to delete <i>trpBA</i>                    |
| AH0843 | ACGGATCCCCGGAATCATATTTTTCTATTATTT    |                                                             |
| AH0844 | CAGCTCCAGCCTACAATGAAAGCTGCAACAAAATA  |                                                             |
| AH0845 | CGCGAATTCAGTAGTGGTGTAAAATAATGCTGATT  |                                                             |
| AH0846 | CGCCATGGCGGCCGGGAGCATG               | In-Fusion primers to amplify pGEM-T Easy                    |
| AH0847 | ACTAGTGAATTCGCGGCCGCCTGCA            |                                                             |
| AH0848 | TGTAGGCTGGAGCTGCTTCG                 | In-Fusion primers to amplify <i>specR-rpsL<sub>Ng</sub></i> |
| AH0849 | ATTCCGGGGATCCGTCGACC                 |                                                             |

## Amino Acids

( $\mu\text{mol/g}$  protein)

|                   | 86-028NP                          | RM33                               | <i>p</i> value |
|-------------------|-----------------------------------|------------------------------------|----------------|
| <b>Alanine</b>    | <b>4714 <math>\pm</math> 610</b>  | <b>7785 <math>\pm</math> 772</b>   | <b>0.0355</b>  |
| <b>Arginine</b>   | <b>5898 <math>\pm</math> 1190</b> | <b>11367 <math>\pm</math> 952</b>  | <b>0.0230</b>  |
| <b>Asparagine</b> | <b>628 <math>\pm</math> 85</b>    | <b>1242 <math>\pm</math> 137</b>   | <b>0.0188</b>  |
| Aspartic acid     | 947 $\pm$ 132                     | 1390 $\pm$ 127                     | 0.0730         |
| Glutamine         | 430 $\pm$ 69                      | 651 $\pm$ 53                       | 0.0642         |
| Glutamic acid     | 1572 $\pm$ 126                    | 2036 $\pm$ 181                     | 0.1036         |
| <b>Glycine</b>    | <b>3850 <math>\pm</math> 631</b>  | <b>6330 <math>\pm</math> 492</b>   | <b>0.0363</b>  |
| <b>Histidine</b>  | <b>872 <math>\pm</math> 124</b>   | <b>1395 <math>\pm</math> 127</b>   | <b>0.0417</b>  |
| Isoleucine        | 2276 $\pm$ 395                    | 3537 $\pm$ 348                     | 0.0749         |
| <b>Lysine</b>     | <b>8215 <math>\pm</math> 1331</b> | <b>14582 <math>\pm</math> 1389</b> | <b>0.0297</b>  |
| Methionine        | 959 $\pm$ 164                     | 1496 $\pm$ 139                     | 0.0667         |
| <b>Ornithine</b>  | <b>399 <math>\pm</math> 72</b>    | <b>766 <math>\pm</math> 70</b>     | <b>0.0219</b>  |
| Phenylalanine     | 2357 $\pm$ 432                    | 4040 $\pm$ 464                     | 0.0566         |
| Proline           | 651 $\pm$ 162                     | 673 $\pm$ 53                       | 0.9020         |
| <b>Serine</b>     | <b>506 <math>\pm</math> 39</b>    | <b>899 <math>\pm</math> 54</b>     | <b>0.0042</b>  |
| <b>Threonine</b>  | <b>1130 <math>\pm</math> 150</b>  | <b>1935 <math>\pm</math> 207</b>   | <b>0.0345</b>  |
| Tryptophan        | 73 $\pm$ 17                       | 73 $\pm$ 11                        | 0.9874         |
| <b>Tyrosine</b>   | <b>1190 <math>\pm</math> 193</b>  | <b>2018 <math>\pm</math> 178</b>   | <b>0.0343</b>  |
| Valine            | 2667 $\pm$ 482                    | 3898 $\pm$ 293                     | 0.0944         |

## Biogenic Amines

( $\mu\text{mol/g}$  protein)

|           | 86-028NP | RM33 | <i>p</i> value |
|-----------|----------|------|----------------|
| Ac-Orn    | ND       | ND   |                |
| ADMA      | ND       | ND   |                |
| alpha-AAA | ND       | ND   |                |



|                   |                 |                 |               |
|-------------------|-----------------|-----------------|---------------|
| c4-OH-Pro         | ND              | ND              |               |
| <b>Carnosine</b>  | <b>22 ± 4</b>   | <b>45 ± 3</b>   | <b>0.0077</b> |
| <b>Creatinine</b> | <b>72 ± 14</b>  | <b>158 ± 21</b> | <b>0.0259</b> |
| DOPA              | 3 ± 1           | 7 ± 1           | 0.0514        |
| Dopamine          | ND              | ND              |               |
| <b>Histamine</b>  | <b>10 ± 2</b>   | <b>19 ± 2</b>   | <b>0.0345</b> |
| Kynurenine        | ND              | ND              |               |
| Met-SO            | 177 ± 42        | 294 ± 17        | 0.0603        |
| Nitro-Tyr         | ND              | ND              |               |
| PEA               | ND              | ND              |               |
| <b>Putrescine</b> | <b>70 ± 12</b>  | <b>176 ± 15</b> | <b>0.0051</b> |
| Sarcosine         | ND              | ND              |               |
| Serotonin         | ND              | ND              |               |
| <b>Spermidine</b> | <b>255 ± 55</b> | <b>135 ± 14</b> | <b>0.0198</b> |
| Spermine          | 16 ± 0          | ND              |               |
| <b>t4-OH-Pro</b>  | <b>32 ± 6</b>   | <b>66 ± 6</b>   | <b>0.0184</b> |
| <b>Taurine</b>    | <b>91 ± 13</b>  | <b>195 ± 27</b> | <b>0.0250</b> |

### Acylcarnitines and Phosphatidylcholine ( $\mu\text{mol/g}$ protein)

|                            | 86-028NP           | RM33               | <i>p</i> value |
|----------------------------|--------------------|--------------------|----------------|
| <b>C16</b>                 | <b>0.54 ± 0.14</b> | <b>1.2 ± 0.08</b>  | <b>0.0154</b>  |
| <b>C5-OH<br/>(C3-DC-M)</b> | <b>0.51 ± 0.12</b> | <b>1.00 ± 0.10</b> | <b>0.0376</b>  |
| <b>PC aa C32:0</b>         | <b>0.09 ± 0.02</b> | <b>0.18 ± 0.02</b> | <b>0.0377</b>  |
| <b>PC aa C32:1</b>         | <b>0.05 ± 0.01</b> | <b>0.11 ± 0.01</b> | <b>0.0378</b>  |
| <b>PC aa C32:3</b>         | <b>0.05 ± 0.01</b> | <b>0.11 ± 0.01</b> | <b>0.0378</b>  |
| PC aa C34:1                | 0.47 ± 0.17        | 0.73 ± 0.32        | 0.5159         |
| PC aa C34:2                | 1.02 ± 0.37        | 1.62 ± 0.68        | 0.4831         |
| PC aa C34:3                | 0.04 ± 0.01        | 0.07 ± 0.02        | 0.2258         |

|                      |                     |                     |               |
|----------------------|---------------------|---------------------|---------------|
| <b>PC aa C34:4</b>   | <b>0.05 ± 0.01</b>  | <b>0.09 ± 0.01</b>  | <b>0.0389</b> |
| <b>PC aa C36:0</b>   | <b>3.4 ± 0.82</b>   | <b>6.64 ± 0.66</b>  | <b>0.0377</b> |
| PC aa C36:1          | 0.10 ± 0.02         | 0.16 ± 0.02         | 0.1228        |
| PC aa C36:2          | 0.6 ± 0.22          | 0.93 ± 0.37         | 0.4873        |
| PC aa C36:3          | 0.32 ± 0.11         | 0.50 ± 0.21         | 0.4864        |
| PC aa C36:4          | 0.54 ± 0.19         | 0.83 ± 0.36         | 0.5142        |
| <b>PC aa C36:5</b>   | <b>0.05 ± 0.01</b>  | <b>0.09 ± 0.009</b> | <b>0.0389</b> |
| <b>PC aa C36:6</b>   | <b>0.01 ± 0.003</b> | <b>0.03 ± 0.004</b> | <b>0.0247</b> |
| <b>PC aa C38:0</b>   | <b>0.26 ± 0.06</b>  | <b>0.51 ± 0.05</b>  | <b>0.0376</b> |
| <b>PC aa C38:3</b>   | <b>0.09 ± 0.02</b>  | <b>0.17 ± 0.02</b>  | <b>0.0380</b> |
| PC aa C38:4          | 0.30 ± 0.13         | 0.46 ± 0.22         | 0.5524        |
| PC aa C38:5          | 0.11 ± 0.05         | 0.18 ± 0.06         | 0.4394        |
| PC aa C38:6          | 0.09 ± 0.03         | 0.16 ± 0.06         | 0.3586        |
| <b>PC aa C40:1</b>   | <b>2.76 ± 0.67</b>  | <b>5.39 ± 0.54</b>  | <b>0.0377</b> |
| <b>PC aa C42:1</b>   | <b>0.92 ± 0.34</b>  | <b>2.19 ± 0.28</b>  | <b>0.0445</b> |
| <b>SM (OH) C22:1</b> | <b>0.11 ± 0.03</b>  | <b>0.21 ± 0.02</b>  | <b>0.0380</b> |
| SM C24:1             | 0.38 ± 0.18         | 0.52 ± 0.24         | 0.6562        |
| SM C26:0             | 0.03 ± 0.01         | 0.04 ± 0.01         | 0.8758        |

**Supplemental Table 2. Summary of the quantification of metabolites in biofilms produced by the parent (86-028NP) or RM33.** Red rows indicate statistical significance determined by two-tailed student's t test. Gray rows indicate metabolites that were below the limit of detection.

| Enzyme Activity               | Protein Fold                                   | Exemplar Protein ID                                    | HI strains                      | 86-028NP                      | Query Cover | Identity |
|-------------------------------|------------------------------------------------|--------------------------------------------------------|---------------------------------|-------------------------------|-------------|----------|
| <b>Arginine decarboxylase</b> | AAT with N-terminal REC domain, acid-inducible | <i>Escherichia coli</i> AdiA (NP_418541)               | 5                               | No                            | 88%         | 32%      |
|                               | AAT without N-terminal REC domain              | <i>Bacillus subtilis</i> , SpeA (NP_389346)            | 5                               | No                            | 88%         | 23%      |
|                               | AR ancestral                                   | <i>Chloroflexus auranticus</i> (YP_001634722)          | 0                               | No                            | 0           | 0        |
|                               | AR with four-helical bundle insertion          | <i>Arabidopsis thaliana</i> ADC (AAB72179)             | 0                               | No                            | 0           | 0        |
|                               |                                                | <i>Vibrio vulnificus</i> ADC (Q87JS8.1)                | 17                              | Yes ( <i>lysA</i> , NTHI0884) | 47%         | 25%      |
|                               | AR ODC-like                                    | <i>Paramecium bursaria</i> cholera virus-1 (NP_048554) | 0                               | No                            | 0           | 0        |
|                               | Pyruvyl-dependent biosynthetic                 | <i>Methanococcus jannaschi</i> (Q57764)                | 0                               | No                            | 0           | 0        |
|                               | Pyruvyl-dependent acid resistance              | <i>Chlamydomonas reinhardtii</i> (WP_010883665)        | 0                               | 0                             | 0           | 0        |
|                               | AdoMetDC paralog                               | <i>Sulfolobus solfataricus</i> (Q9UWU1)                | 0                               | 0                             | 0           | 0        |
|                               | <b>Ornithine decarboxylase</b>                 | AAT biosynthetic                                       | <i>E. coli</i> SpeC (NP_417440) | 6                             | No          | 97%      |
| AAT acid-inducible            |                                                | <i>Lactobacillus sp</i> SpeF (CAX67648)                | 5                               | No                            | 88%         | 45%      |
| AR ornithine-specific         |                                                | <i>Homo sapiens</i> (AAA59967)                         | 0                               | 0                             | 0           | 0        |
| AR lysine-specific            |                                                | <i>V. vulnificus</i> (AXX62769.1)                      |                                 | Yes ( <i>lysA</i> , NTHI0884) | 88%         | 27%      |

|                             |                       |                                            |    |                               |     |     |
|-----------------------------|-----------------------|--------------------------------------------|----|-------------------------------|-----|-----|
| <b>Lysine decarboxylase</b> | AAT constitutive      | <i>E. coli</i> LdcC (NP_414728)            | 17 | Yes (6%, NTHI1577)            | 11% | 35% |
|                             | AAT acid-inducible    | <i>E. coli</i> CadA (AAA97031)             | 5  | No                            | 82% | 35% |
|                             | AAT DABA DC paralogue | <i>Streptomyces coelicolor</i> (NP_627012) | 17 | Yes ( <i>ddc</i> , NTHI1119)  | 94% | 36% |
|                             | AR lysine-ornithine   | <i>V. vulnificus</i> (2PLJ_A)              | 16 | Yes ( <i>lysA</i> , NTHI0884) | 92% | 26% |

| Enzyme Activity                | Protein Fold        | Exemplar Protein ID                            | HI strains | 86-028NP | Query Cover | Identity |
|--------------------------------|---------------------|------------------------------------------------|------------|----------|-------------|----------|
| <b>AdoMetDC</b>                | Pyruvoyl-dependent  | <i>E. coli</i> SpeD (NP_414662)                | 0          | 0        | 0           | 0        |
|                                | Class 1A            | <i>Thermotoga maritima</i> SpeD (WP_004081137) | 0          | 0        | 0           | 0        |
|                                | Class 1B            | <i>H. sapiens</i> (P17707)                     | 0          | 0        | 0           | 0        |
| <b>Aminopropyl transferase</b> | Spermidine synthase | <i>H. sapiens</i> (NP_003123)                  | 0          | 0        | 0           | 0        |
|                                |                     | <i>T. maritima</i> (AKE28440)                  | 0          | 0        | 0           | 0        |
|                                |                     | <i>Caenorhabditis elegans</i> (CAC37332)       | 0          | 0        | 0           | 0        |
|                                |                     | <i>Trypanosoma cruzi</i> (4YV0_D)              | 0          | 0        | 0           | 0        |
|                                |                     | <i>Plasmodium falciparum</i> (CAB71155)        | 0          | 0        | 0           | 0        |

|                                          |                                             |                                                        |    |                                  |     |     |
|------------------------------------------|---------------------------------------------|--------------------------------------------------------|----|----------------------------------|-----|-----|
|                                          |                                             | <i>E. coli</i><br>(BAB96695)                           | 0  | 0                                | 0   | 0   |
|                                          | Agmatine/triamine<br>aminopropyltransferase | <i>T. thermophilus</i><br>SpeE (3ANX_B)                | 17 | Yes ( <i>ackA</i> ,<br>NTHI1375) | 41% | 26% |
|                                          | Spermine Synthase                           | <i>H. sapiens</i><br>(NP_415220)                       | 6  | No                               | 97% | 66% |
|                                          | Tspm synthase                               | <i>A. thaliana</i> Act5<br>(AED92722)                  | 0  | 0                                | 0   | 0   |
| <b>Carboxytriamine<br/>dehydrogenase</b> | CANDH                                       | <i>V. cholera</i><br>(NP_231262)                       | 0  | 0                                | 0   | 0   |
|                                          | CASDH                                       | <i>Campylobacter</i><br><i>jejuni</i> (AJP34684)       | 0  | 0                                | 0   | 0   |
|                                          |                                             | <i>A. tumerfaciens</i><br>C58(atu4170)                 | 0  | 0                                | 0   | 0   |
| <b>Carboxytriamine<br/>decarboxylase</b> | CANDC                                       | <i>V. cholera</i><br>(NP_231262)                       | 0  | 0                                | 0   | 0   |
|                                          | CASDC                                       | <i>C. jejuni</i><br>(A8FNH9)                           | 0  | 0                                | 0   | 0   |
|                                          |                                             | <i>A. tumerfaciens</i><br>C58(atu4169)                 | 0  | 0                                | 0   | 0   |
| <b>Homospermidine<br/>synthase</b>       | HSS                                         | <i>Legionella</i><br><i>pneumophila</i><br>(ADG25880)  | 0  | 0                                | 0   | 0   |
|                                          |                                             | <i>Blastochloris</i><br><i>viridis</i><br>(AAB63957.1) | 0  | 0                                | 0   | 0   |
|                                          | DHS                                         | <i>H. sapiens</i>                                      |    |                                  |     |     |
|                                          |                                             | <i>Senecia vulgaris</i><br>(CAB66389)                  | 0  | 0                                | 0   | 0   |

**Supplemental Table 3. List of known proteins involved in polyamine biosynthesis.** Adapted from information provided in reference 84.
